# Supplementary material for: Feed your microbes to deal with stress: a psychobiotic diet impacts microbial stability and perceived stress in a healthy adult population
Source: Springer Nature journal article supplement (doi:10.1038/s41380-022-01817-y), 2022-10-26
Supplement: MOESM2 [file 41380_2022_1817_MOESM2_ESM.pdf]

**Dear participant,**

Below is a list of foods that you will focus on during the 4-week intervention. You can also find different ideas of how to incorporate these foods into your daily diet on the next page.

**List of Foods to Include**

**Fruits (3 servings/day) and Vegetables (6 servings/day)**

- Apples
- Bananas
- Berries
- Peaches
- Onions
- Cabbage/Chicory
- Leeks
- Asparagus
- Garlic
- Carrots
- Sweet potatoes
- Bell Peppers
- Artichokes/Jerusalem Artichokes

**Grains (5 to 8 servings/day) and Legumes (3 to 4 servings/week)**

- Whole grain products
- Oats
- Quinoa
- Barley
- Nuts
- Chia Seeds
- Chickpeas/Hummous
- Lentils
- Flax seeds (ground)
- Beans

**Fermented Foods (2-3 servings/day)**

- Kefir
- Sauerkraut
- Kombucha
- Probiotic-containing products (i.e., yoghurts, Yakult)

## **How can you use these foods in your diet?**

- Aim for eating 6-9 servings of fruits and vegetables per day. Most of these should include the fruits and vegetables listed above.
- Fruit: Eat a whole apple or slice it up and eat with your cereal or oat. It also makes a great addition to smoothies with other fruits. For example, you can add some Kefir and fruits in a blender and make a smoothie rich in prebiotics
- Vegetables: Oven roasted vegetables are easy to make and add an extra crunch. You can also add some fresh garlic which enhances taste and adds additional prebiotics.
- Grains: Consume whole grains instead of refined grains (e.g., white bread).
- Sprinkle Chia seeds or flax seeds on your salad or in yogurt or with your oats. You can also add some berries to increase the flavour.
- Kefir: If the Kefir is too bitter, you can make a smoothie by adding some fruit and spices such as cinnamon or a little bit of cocoa.
- Legumes: Quinoa, barley and chickpeas are great additions to salads. Here you can also add some onions and other vegetables to enhance the flavour and adding more prebiotics.
- You can buy canned chickpeas for easy use. Quinoa and barley have to be cooked before use. However, just like boiling rice, it is very easy to prepare. You can also find prepared food with quinoa which are easier to use.
- Instead of chickpeas, you can also eat hummous. Pair them with crackers that are made of whole wheat or quinoa and other grains.
- Nuts: A handful of nuts make a great snack for in-between meals.
- Kombucha is a fermented black or green tea. You can enjoy it with your meal or as a drink to sip on during the day.
- Sauerkraut can be enjoyed in various different ways. Try adding it to soups, casseroles, sandwiches or simply enjoy it with some mashed potatoes.
- Leeks and cabbage: Prepare a stir fry as a delicious way to enjoy leeks and cabbage. You can also add some onions and garlic for more flavour.

## Example Meal Plan

| Meal                   | Day 1                                                                                         | Day 2                                                                                                                  | Day 3                                                          | Day 4                                                                  | Day 5                                                                                  | Day 6                                                                | Day 7                                                                                                |
|------------------------|-----------------------------------------------------------------------------------------------|------------------------------------------------------------------------------------------------------------------------|----------------------------------------------------------------|------------------------------------------------------------------------|----------------------------------------------------------------------------------------|----------------------------------------------------------------------|------------------------------------------------------------------------------------------------------|
| <b>Breakfast</b>       | Porridge or oat (2/3 cup) with 1 banana                                                       | Kefir smoothie with fruit (from fruit list) and flax seeds (250 mL)<br>1 slice of whole wheat bread with peanut butter | Scrambled eggs on whole wheat toast with avocado and tomatoes  | Porridge or oat (1/3 cup) with ½ cup of blueberries                    | Yoghurt (e.g., Activia) with flax seeds and berries                                    | Whole grain cereal (e.g., Bran flakes) with milk<br>½ cup of berries | Kefir smoothie with fruit and flax seeds (250 mL)<br>1 slice of whole wheat bread with peanut butter |
| <b>Morning Snack</b>   | Handful of nuts (with skin)<br>½ cup of berries                                               | 1 Orange                                                                                                               | 1 Yoghurt (e.g., Activia) with fruit                           | Handful of nuts<br>½ cup of berries                                    | 1 banana with peanut butter<br>High fibre granola bar                                  | 1 cup of Kefir<br>1 medium apple                                     | 2 Mandarins<br>Handful of nuts                                                                       |
| <b>Lunch</b>           | Whole grain bread with crumbled eggs with sauerkraut, and avocado <b>(R)</b>                  | Reuben sandwich (Rye bread, corned beef and Sauerkraut) <b>(R)</b>                                                     | Chickpea Salad Wraps with Sauerkraut and vegetables <b>(R)</b> | Barley vegetable soup with chorizo <b>(R)</b>                          | Sandwich (whole grain bread, low fat cheese, lunch meat, lettuce, tomatoes, cucumbers) | Chicken sauerkraut apple Panini <b>(R)</b>                           | Tuna, avocado, quinoa salad <b>(R)</b>                                                               |
| <b>Afternoon Snack</b> | 1 medium apple<br>1 cup of Kefir                                                              | 1 Yoghurt (e.g., Activia) with fruit (from fruit list)                                                                 | 1 banana<br>1 cup of Kefir                                     | 1 medium apple<br>1 cup of Kefir                                       | Hummous with 6 wholemeal crackers and carrots<br>1 cup of Kefir                        | Handful of nuts<br>2 mandarins                                       | Hummous with 6 wholemeal crackers and carrots                                                        |
| <b>Dinner</b>          | Grilled chicken, oven roasted asparagus (with olive oil and garlic) and 1 medium sweet potato | Whole grain spaghetti with Chia seed meatballs and marinara sauce <b>(R)</b><br>Green salad                            | Vegetable stir fry with pork loin and brown rice               | Whole grain chicken pasta with vegetables and cabbage and tomato sauce | Beans and cabbage soup with slice of whole grain bread <b>(R)</b>                      | Mediterranean salad and fish <b>(R)</b>                              | Lean ground beef and cabbage casserole <b>(R)</b>                                                    |

\*Drink a cup of Kombucha with your lunch or dinner or as a snack during the day

## Examples of Food groups and serving sizes

### Estimating serving sizes

Use a disposable plastic cup to guide portion sizes of grains and cereal, vegetables and beverages

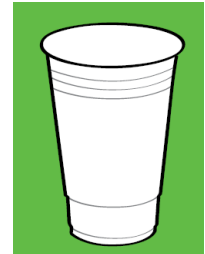

### Vegetables

1 serving equals

½ disposable 200 mL cup cooked or raw vegetables, 1 disposable 200 mL cup of leafy vegetables

### Fruit

1 serving equals

1 medium piece of fruit (i.e., apple), 2 smaller size fruit (i.e., mandarins), 10 grapes, 6 strawberries, ½ cup blueberries

### Grains, Nuts and Legumes

1 serving equals

1 slice of whole wheat bread, 2 breakfast wheat or oat biscuits, 1/3 cup of raw porridge oats, 6 wholemeal crackers, 1 cup sweet potatoes or ½ cup of cooked whole wheat pasta or brown rice

Handful (30g) of nuts, 1-2 teaspoons of peanut butter, 2-3 tablespoons of seeds  
½ disposable 200 mL cup of lentils, beans or chickpeas

### Fermented foods

1 serving equals

1 cup of kefir or Kombucha, ½ cup of sauerkraut, ¾ cup of yoghurt

## Barley-Vegetable Soup with Chorizo

### Ingredients:

- 1 tbsp olive oil
- 200g Chorizo (sliced and quartered)
- 2 large carrots (chopped)
- 1 leek (chopped)
- 1.5 tbsp tomato paste
- 900 mL vegetable stock
- 1 can diced tomatoes
- 90 g barley (cooked)
- 1 courgette
- 2 handful of kale leaves (chopped)
- Salt, pepper, red pepper flakes and parsley to taste

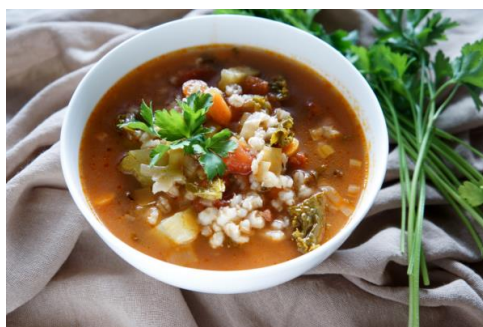

### Preparation:

1. In a pot on medium heat, heat the olive oil and add chorizo. Cook until chorizo is crisp on edges, stirring occasionally.
2. Add carrots and leeks. Cook until leeks are translucent and carrots have softened. Add tomato paste, vegetable stock and canned tomatoes, stirring until everything is fully incorporated.
3. Once the soup begins to simmer, add the remaining ingredients. Simmer for 15 minutes until courgette is cooked and kale is tender. Season to taste.

(Source: <http://www.carolyngcreates.com/2016/10/03/barley-soup-with-smoked-chorizo/>)

## Bean and Cabbage Stew

### Ingredients:

- 1 large onion, chopped
- 3 ribs celery, chopped
- 2 to 3 cloves garlic, minced
- ½ head cabbage, chopped
- 4 carrots, sliced
- 1 to 1.5 lbs potatoes, diced
- 1/3 cup pearled barley
- 1 bay leaf
- 1 tsp thyme
- ½ tsp rosemary
- ½ tsp black pepper
- 1.5 L vegetable broth
- 2 cans beans, drained
- 1 can diced tomatoes
- 1 tbsp parsley, chopped
- Salt to taste

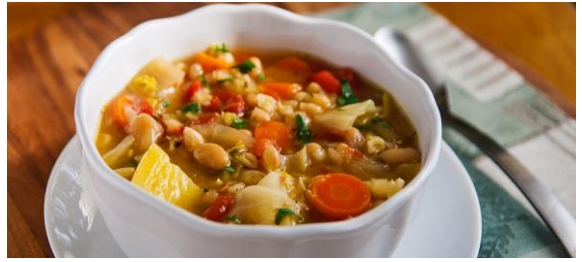

### Preparation:

4. Place vegetables, seasonings, barley and broth into large pot. Cover and simmer until vegetables are tender, about 45 minutes.
5. Add remaining ingredients and add more seasoning if necessary.
6. Simmer uncovered for 15 minutes.

(Source: <https://www.forksoverknives.com/recipes/irish-white-bean-and-cabbage-stew/#gs.9mgLb2MU>)

## Chia Meatballs with Marinara Sauce

### Ingredients:

#### Chia Meatballs:

- 1 lbs ground beef
- 2 tbsp tomato paste
- 2 cloves garlic (minced)
- 2 tsp Italian herbs
- 1 tsp salt
- 1 tsp pepper
- 2 tbsp chia seeds
- 2 tsp oil (for sautéing; e.g., olive or avocado oil)

#### Marinara sauce:

- 1 medium onion
- 1 clove garlic
- 125 mL beef or chicken stock
- 1 can diced tomatoes
- 1 can tomato sauce
- Salt and pepper to taste
- Seasoning (e.g., rosemary, oregano)

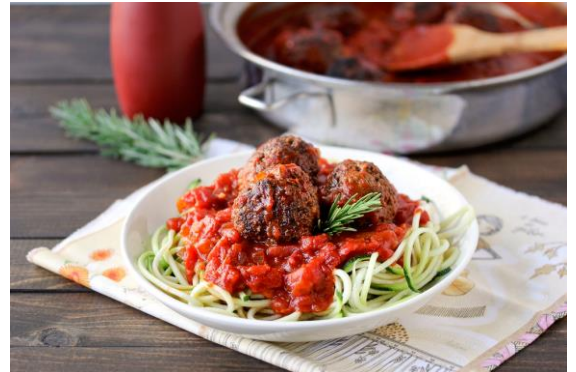

### Preparation:

1. Combine all ingredients (ground beef, tomato paste, garlic, herbs, salt, pepper, chia seeds) in a bowl. Let rest for 10 minutes.
2. Scoop 8 balls and pat into a round shape
3. Heat a large skillet over medium heat and add the oil. Cook meatballs until brown, turning on at least 3 sides. Move meatballs to a plate to rest (they will not be fully cooked yet, but will finish cooking later in the sauce).
4. In the same pan, add the onion and sauté until translucent (3-5 minutes). Add garlic and seasoning.
5. Add stock, diced tomatoes, and tomato sauce and cook over medium heat until sauce begins to thicken (15-20 minutes).
6. Reduce heat to medium low and add meatballs. Cook 5-10 minutes or until meatballs are cooked through.
7. Serve with whole grain spaghetti or try spiralized vegetables (such as courgettes).

(Source: <https://barerootgirl.com/nourish/2013/9/22/in-season-chia-meatballs-with-easy-marinara-a-giveaway/>)

## Chicken-Sauerkraut-Apple Panini

### Ingredients:

- Sauerkraut
- Whole wheat bread
- Apple
- Chicken breast lunch meat
- Cheese (e.g., Swiss cheese)
- Butter

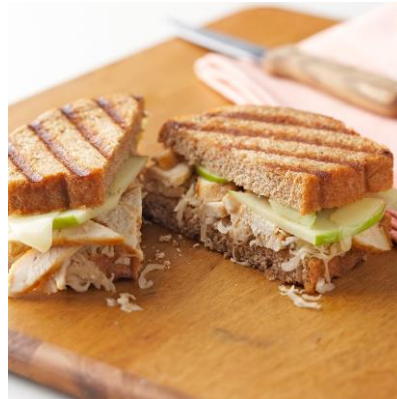

### Preparation:

7. Place sauerkraut in a colander and rinse with cold water. Drain well and press out excess liquid.
8. Coat one side of the bread with butter. Top the other side with chicken, sauerkraut, apple slices and cheese.
9. Preheat a grill pan and add sandwiches. Use a spatula to press the sandwiches down, cooking 6 to 8 minutes on each side or until bottoms are toasted.

(Source: <http://www.eatingwell.com/recipe/259852/chicken-sauerkraut-and-apple-panini/>)



## Chickpea Salad Wrap with Sauerkraut

### Ingredients: (3 wraps)

- 1 can chickpeas (drained and rinsed)
- 3 tbsp tahini
- 8 tbsp sauerkraut
- 5 tbsp diced tomatoes
- 4 tbsp diced celery
- 1 tsp rice vinegar
- 1 tbsp lemon juice
- ½ tbsp sesame seeds
- ½ tbsp. dried chives
- Wraps of choice
- Shredded carrots
- Spinach

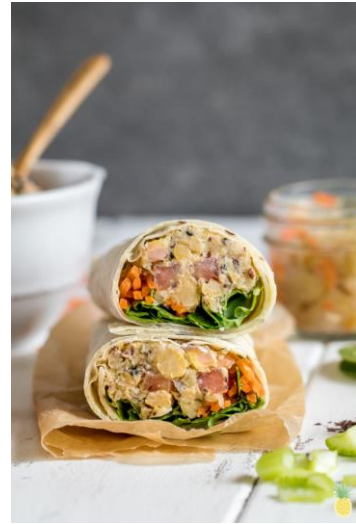

### Preparation:

10. Place chickpeas in a mixing bowl and add the tahini. Mash up the chickpeas with fork or potato masher until almost smooth.
11. Fold in the remaining ingredients and season to taste.
12. Place carrots and spinach on the wrap and top with the chickpea sauerkraut salad. Tip: heat up the wrap in the microwave to make it soft and pliable, if desired.

(Source: <https://sweetsimplevegan.com/2017/08/chickpea-sauerkraut-salad-wraps/>)

## Ground Beef and Cabbage Casserole

### Ingredients:

- 1 to 1.5 lbs lean ground beef
- 1 medium onion, chopped
- 1 green bell pepper, chopped
- 1 can diced tomatoes
- 2 tsp cider vinegar
- 1 tsp garlic powder
- 1 head cabbage, coarsely chopped
- 150 g grated Cheddar cheese

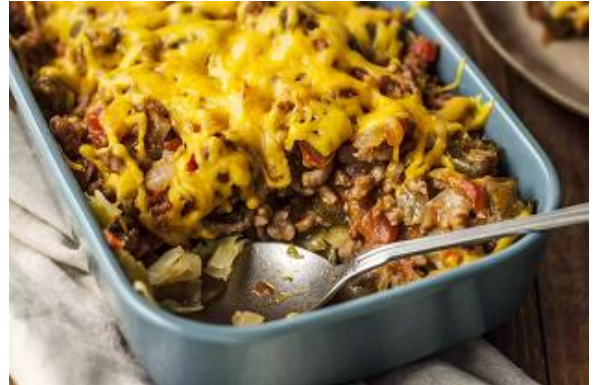

### Preparation:

13. Preheat oven to 180° C.
14. In a large skillet, cook ground beef, onion and green pepper until meat is no longer pink.
15. Stir in diced tomatoes, vinegar, and garlic powder.
16. Simmer, uncovered, for 10 minutes. Season to taste and set aside.
17. Put about 3 cm of water and a pinch of salt in a large saucepan. Add the cabbage and bring to a boil. Reduce heat to medium low, cover and cook for about 10 minutes. Drain thoroughly.
18. Arrange cabbage in a casserole pan. Pour ground beef mixture over cabbage and bake uncovered for 20-25 minutes.
19. Sprinkle cheese over the casserole and bake for another 5 minutes, until cheese has melted.

(Source: <https://www.thespruceeats.com/ground-beef-and-cabbage-casserole-3057387>)

## Mediterranean Salad

### Ingredients:

- 1 container red cherry tomatoes, halved
- 1 container yellow cherry tomatoes, halved
- 1 can chickpeas, drained and rinsed
- 1 cucumber, diced
- 1 avocado, diced
- 1 pack feta cheese, crumbled
- 4 tbsp olive oil
- 2 tbsp lemon juice
- 2 cloves garlic, minced
- Fresh basil

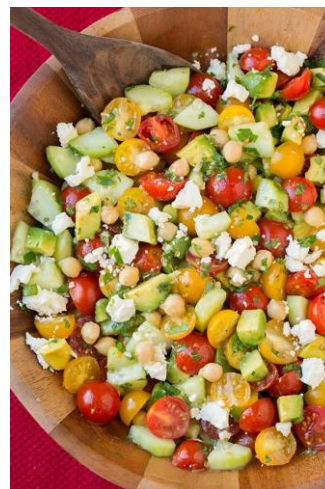

### Preparation:

20. In a salad bowl toss together tomatoes, chickpeas and cucumber.
21. Add avocado and feta and toss gently.
22. Add olive oil, lemon juice, garlic and basil and toss until evenly coated.

(Source: <https://www.cookingclassy.com/tomato-avocado-cucumber-chick-pea-salad-with-feta-and-greek-lemon-dressing/>)

## Reuben Sandwich

### Ingredients:

- Rye or sourdough bread
- Butter
- 2-3 slices corned beef
- 1 slice Swiss cheese (or Emmental or Gruyère)
- 2-3 tbsp sauerkraut
- 1 tbsp Thousand Island Dressing

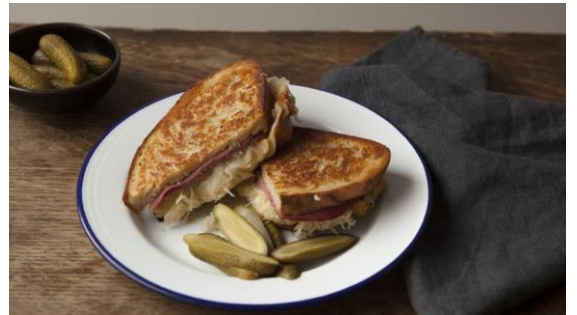

### Preparation:

1. Spread the Thousand Island dressing on both slices of bread. Then put the corned beef on one slice and top it with sauerkraut and the cheese.
2. Heat sandwich in a sandwich maker or frying pan. If using frying pan, put butter in the pan, press sandwich down onto the pan with a spatula and heat for 3-4 minutes from each side until the bread is browned and the cheese has melted.

(Source: [https://www.bbc.com/food/recipes/reuben\\_sandwich\\_25821](https://www.bbc.com/food/recipes/reuben_sandwich_25821))

## Tuna-Avocado-Quinoa Salad

### Ingredients:

- 100 g quinoa
- 3 tbsp extra virgin olive oil
- Juice from 1 lemon
- ½ tbsp white wine vinegar
- 120 g can tuna, drained
- 1 avocado, diced
- 200g cherry tomatoes, halved
- 50g feta, crumbled
- 50g baby spinach
- 2 tbsp mixed seeds, toasted

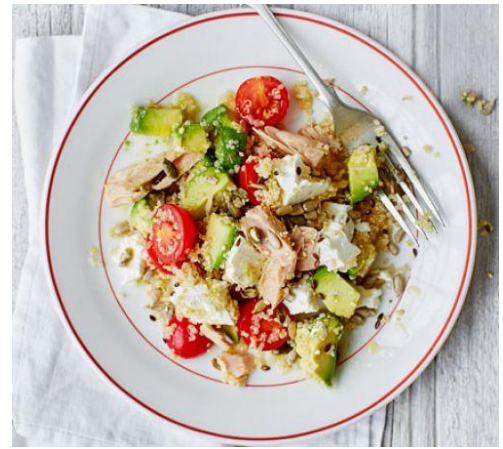

### Preparation:

23. Rinse quinoa under cold water and prepare according to package instructions. Transfer to a bowl to cool.
24. In another bowl, combine the oil, lemon juice and vinegar with some seasoning.
25. Once quinoa has cooled, mix with the dressing and remaining ingredients.

(Source: <https://www.bbcgoodfood.com/recipes/tuna-avocado-quinoa-salad>)

## Whole grain bread with scrambled eggs, avocado and sauerkraut

### Ingredients:

- Whole grain bread
- Sauerkraut
- Avocado
- Scrambled eggs

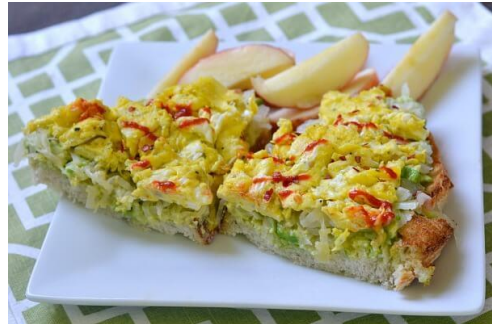

### Preparation:

3. Cut the avocado in half, scoop it out and spread it on the bread. *Tip:* You can toast the bread to give it some extra crunchiness.
4. Add a layer of sauerkraut. You can use as much or as little as you want.
5. Scramble your eggs. Season with salt and pepper or other seasonings to taste. Then top the sandwich with the scrambled eggs.
6. *Tip:* You can add other vegetables (e.g., tomato) or any sauces (e.g., Siracha sauce) to the sandwich to cater it to your taste.

(Source: <https://www.peanutbutterranner.com/avocado-sauerkraut-and-scrambled-egg-toast/>)

## Weekly Checklist

| Food Group<br>Ideal serves             | Food Consumption                                                                                                                                                                                              |                                                                                                                                                                                                               |                                                                                                                                                                                                               |                                                                                                                                                                                                               |                                                                                                                                                                                                               |                                                                                                                                                                                                               |                                                                                                                                                                                                               |                                                                                                                                                                                                               |
|----------------------------------------|---------------------------------------------------------------------------------------------------------------------------------------------------------------------------------------------------------------|---------------------------------------------------------------------------------------------------------------------------------------------------------------------------------------------------------------|---------------------------------------------------------------------------------------------------------------------------------------------------------------------------------------------------------------|---------------------------------------------------------------------------------------------------------------------------------------------------------------------------------------------------------------|---------------------------------------------------------------------------------------------------------------------------------------------------------------------------------------------------------------|---------------------------------------------------------------------------------------------------------------------------------------------------------------------------------------------------------------|---------------------------------------------------------------------------------------------------------------------------------------------------------------------------------------------------------------|---------------------------------------------------------------------------------------------------------------------------------------------------------------------------------------------------------------|
|                                        | This checklist will help you to remember what to eat every day.<br>Place a tick (✓) in the box every time you have a single serve from the food group listed.                                                 |                                                                                                                                                                                                               |                                                                                                                                                                                                               |                                                                                                                                                                                                               |                                                                                                                                                                                                               |                                                                                                                                                                                                               |                                                                                                                                                                                                               |                                                                                                                                                                                                               |
|                                        | Day 1                                                                                                                                                                                                         | Day 2                                                                                                                                                                                                         | Day 3                                                                                                                                                                                                         | Day 4                                                                                                                                                                                                         | Day 5                                                                                                                                                                                                         | Day 6                                                                                                                                                                                                         | Day 7                                                                                                                                                                                                         |                                                                                                                                                                                                               |
| <b>Vegetables</b><br>6 servings/day    | <input type="checkbox"/> <input type="checkbox"/> <input type="checkbox"/><br><input type="checkbox"/> <input type="checkbox"/> <input type="checkbox"/>                                                      | <input type="checkbox"/> <input type="checkbox"/> <input type="checkbox"/><br><input type="checkbox"/> <input type="checkbox"/> <input type="checkbox"/>                                                      | <input type="checkbox"/> <input type="checkbox"/> <input type="checkbox"/><br><input type="checkbox"/> <input type="checkbox"/> <input type="checkbox"/>                                                      | <input type="checkbox"/> <input type="checkbox"/> <input type="checkbox"/><br><input type="checkbox"/> <input type="checkbox"/> <input type="checkbox"/>                                                      | <input type="checkbox"/> <input type="checkbox"/> <input type="checkbox"/><br><input type="checkbox"/> <input type="checkbox"/> <input type="checkbox"/>                                                      | <input type="checkbox"/> <input type="checkbox"/> <input type="checkbox"/><br><input type="checkbox"/> <input type="checkbox"/> <input type="checkbox"/>                                                      | <input type="checkbox"/> <input type="checkbox"/> <input type="checkbox"/><br><input type="checkbox"/> <input type="checkbox"/> <input type="checkbox"/>                                                      | <input type="checkbox"/> <input type="checkbox"/> <input type="checkbox"/><br><input type="checkbox"/> <input type="checkbox"/> <input type="checkbox"/>                                                      |
| <b>Fruit</b><br>3 servings/day         | <input type="checkbox"/> <input type="checkbox"/> <input type="checkbox"/>                                                                                                                                    | <input type="checkbox"/> <input type="checkbox"/> <input type="checkbox"/>                                                                                                                                    | <input type="checkbox"/> <input type="checkbox"/> <input type="checkbox"/>                                                                                                                                    | <input type="checkbox"/> <input type="checkbox"/> <input type="checkbox"/>                                                                                                                                    | <input type="checkbox"/> <input type="checkbox"/> <input type="checkbox"/>                                                                                                                                    | <input type="checkbox"/> <input type="checkbox"/> <input type="checkbox"/>                                                                                                                                    | <input type="checkbox"/> <input type="checkbox"/> <input type="checkbox"/>                                                                                                                                    |                                                                                                                                                                                                               |
| <b>Grains</b><br>5 to 8 servings/day   | <input type="checkbox"/> <input type="checkbox"/> <input type="checkbox"/><br><input type="checkbox"/> <input type="checkbox"/> <input type="checkbox"/><br><input type="checkbox"/> <input type="checkbox"/> | <input type="checkbox"/> <input type="checkbox"/> <input type="checkbox"/><br><input type="checkbox"/> <input type="checkbox"/> <input type="checkbox"/><br><input type="checkbox"/> <input type="checkbox"/> | <input type="checkbox"/> <input type="checkbox"/> <input type="checkbox"/><br><input type="checkbox"/> <input type="checkbox"/> <input type="checkbox"/><br><input type="checkbox"/> <input type="checkbox"/> | <input type="checkbox"/> <input type="checkbox"/> <input type="checkbox"/><br><input type="checkbox"/> <input type="checkbox"/> <input type="checkbox"/><br><input type="checkbox"/> <input type="checkbox"/> | <input type="checkbox"/> <input type="checkbox"/> <input type="checkbox"/><br><input type="checkbox"/> <input type="checkbox"/> <input type="checkbox"/><br><input type="checkbox"/> <input type="checkbox"/> | <input type="checkbox"/> <input type="checkbox"/> <input type="checkbox"/><br><input type="checkbox"/> <input type="checkbox"/> <input type="checkbox"/><br><input type="checkbox"/> <input type="checkbox"/> | <input type="checkbox"/> <input type="checkbox"/> <input type="checkbox"/><br><input type="checkbox"/> <input type="checkbox"/> <input type="checkbox"/><br><input type="checkbox"/> <input type="checkbox"/> | <input type="checkbox"/> <input type="checkbox"/> <input type="checkbox"/><br><input type="checkbox"/> <input type="checkbox"/> <input type="checkbox"/><br><input type="checkbox"/> <input type="checkbox"/> |
| <b>Fermented Foods</b><br>2 per day    | <input type="checkbox"/> <input type="checkbox"/>                                                                                                                                                             | <input type="checkbox"/> <input type="checkbox"/>                                                                                                                                                             | <input type="checkbox"/> <input type="checkbox"/>                                                                                                                                                             | <input type="checkbox"/> <input type="checkbox"/>                                                                                                                                                             | <input type="checkbox"/> <input type="checkbox"/>                                                                                                                                                             | <input type="checkbox"/> <input type="checkbox"/>                                                                                                                                                             | <input type="checkbox"/> <input type="checkbox"/>                                                                                                                                                             |                                                                                                                                                                                                               |
| <b>Legumes</b><br>3 to 4 servings/week | <input type="checkbox"/> <input type="checkbox"/> <input type="checkbox"/> <input type="checkbox"/>                                                                                                           |                                                                                                                                                                                                               |                                                                                                                                                                                                               |                                                                                                                                                                                                               |                                                                                                                                                                                                               |                                                                                                                                                                                                               |                                                                                                                                                                                                               |                                                                                                                                                                                                               |

## The Food Pyramid

For adults, teenagers and children aged five and over

Not needed for good health.

**Foods and drinks high in fat, sugar and salt**

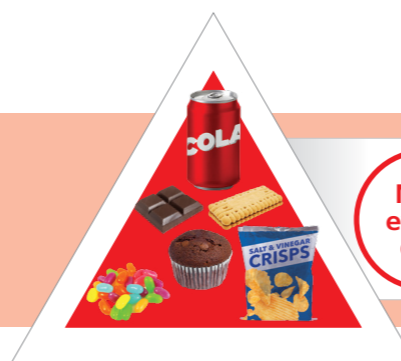

**NOT every day**

**Most people consume snacks high in fat, sugar and salt and sugar sweetened drinks up to 6 times a day (Healthy Ireland Survey 2016). There are no recommended servings for Top Shelf foods and drinks because they are not needed for good health.**

**Fats, spreads and oils**

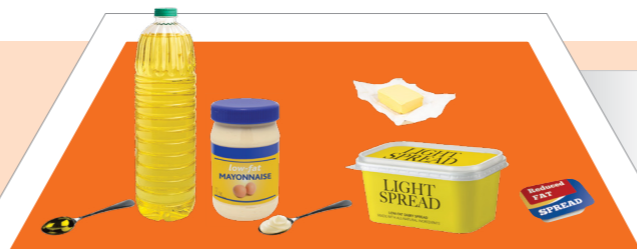

**In very small amounts**

**Use as little as possible.** Choose mono or polyunsaturated reduced-fat or light spreads. Choose rapeseed, olive, canola, sunflower or corn oils. Limit mayonnaise, coleslaw and salad dressings as they also contain oil. Always cook with as little fat or oil as possible – grilling, oven-baking, steaming, boiling or stir-frying.

**Meat, poultry, fish, eggs, beans and nuts**

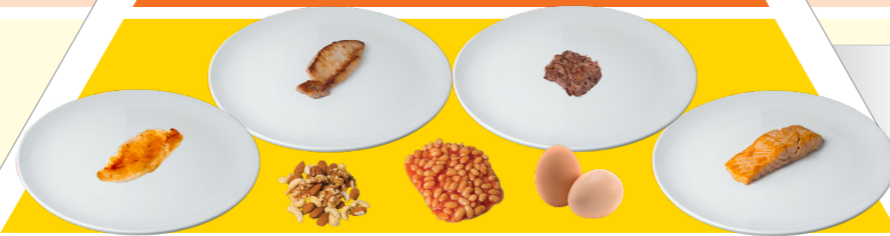

**2 Servings a day**

Choose lean meat, poultry (without skin) and fish. Eat oily fish up to twice a week. Choose eggs, beans and nuts. Limit processed salty meats such as sausages, bacon and ham.

**Milk, yogurt and cheese**

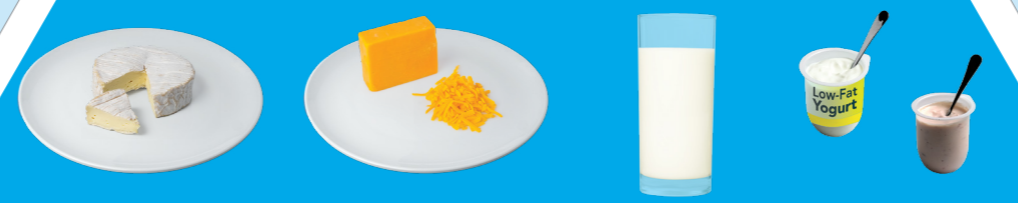

**3 Servings a day**

**5 for children age 9–12 and teenagers age 13–18**  
Choose reduced-fat or low-fat varieties. Choose low-fat milk and yogurt more often than cheese. Enjoy cheese in small amounts. Women who are pregnant or breastfeeding need 3 servings a day.

**Wholemeal cereals and breads, potatoes, pasta and rice**

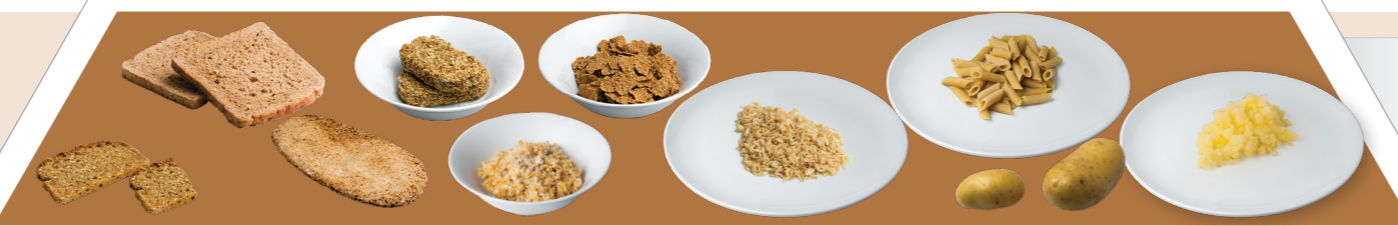

**3-5\* Servings a day**

**Up to 7\* for teenage boys and men age 19–50**  
Wholemeal and wholegrain cereals are best. Enjoy at each meal. The number of servings depends on age, size, if you are a man or a woman and on activity levels. Watch your serving size and use the Daily Servings Guide below.\*

**Vegetables, salad and fruit**

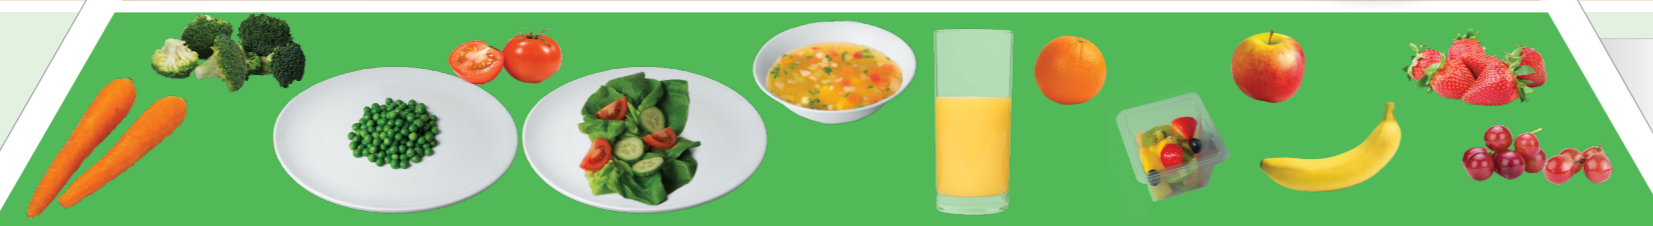

**5-7 Servings a day**

Base your meals on these and enjoy a variety of colours. More is better. Limit fruit juice to unsweetened, once a day.

Needed for good health. Enjoy a variety every day.

### \*Daily Servings Guide – wholemeal cereals and breads, potatoes, pasta and rice

| Active | Child (5–12) | Teenager (13–18) | Adult (19–50) | Adult (51+) | Inactive | Teenager (13–18) | Adult (19–50) | Adult (51+) |
|--------|--------------|------------------|---------------|-------------|----------|------------------|---------------|-------------|
|        |              | 3–4              | 4             | 4–5         |          | 3–4              |               | 3           |
|        | 3–5          | 5–7              | 5–7           | 4–5         |          | 4–5              | 4–6           | 4           |

There is no guideline for inactive children as it is essential that all children are active.

### Average daily calorie needs for all foods and drinks for adults

**Active** 2000kcal **Inactive** 1800kcal      **Active** 2500kcal **Inactive** 2000kcal

### Serving size guide

|                                                                                                                                     |                                                                         |                                                                                                                                   |                                                                                                                                            |                                                                              |
|-------------------------------------------------------------------------------------------------------------------------------------|-------------------------------------------------------------------------|-----------------------------------------------------------------------------------------------------------------------------------|--------------------------------------------------------------------------------------------------------------------------------------------|------------------------------------------------------------------------------|
| <b>Cereals, cooked rice and pasta, and vegetables, salad and fruit</b><br>Use a 200ml disposable plastic cup to guide serving size. | <b>Cheese</b><br>Use two thumbs, width and depth to guide serving size. | <b>Meat, poultry, fish</b><br>The palm of the hand, width and depth without fingers and thumbs, shows how much you need in a day. | <b>Reduced-fat spread</b><br>Portion packs found in cafes can guide the amount you use. One pack should be enough for two slices of bread. | <b>Oils</b><br>Use one teaspoon of oil per person when cooking or in salads. |
|-------------------------------------------------------------------------------------------------------------------------------------|-------------------------------------------------------------------------|-----------------------------------------------------------------------------------------------------------------------------------|--------------------------------------------------------------------------------------------------------------------------------------------|------------------------------------------------------------------------------|

**Drink at least 8 cups of fluid a day – water is best**

**Get Active!**  
To maintain a healthy weight adults need at least 30 minutes a day of moderate activity on 5 days a week (or 150 minutes a week); children need to be active at a moderate to vigorous level for at least 60 minutes every day.
